# Supplementary material for: Organic superbase derived ionic liquids based on the TFSI anion: synthesis, characterization, and electrochemical properties
Source: Royal Society of Chemistry journal article supplement (doi:10.1039/c7nj00407a), 2017-01-01
Supplement: c7nj00407a1.pdf [file c7nj00407a1.pdf]

# Organic Superbase Derived Ionic Liquids Based on the TFSI Anion: Synthesis, Characterization, and Electrochemical Properties

Zhi Wang, Zuopeng Li\*, Yunhe Jin, Wei Liu, Linhai Jiang\*, and Qinghua Zhang\*

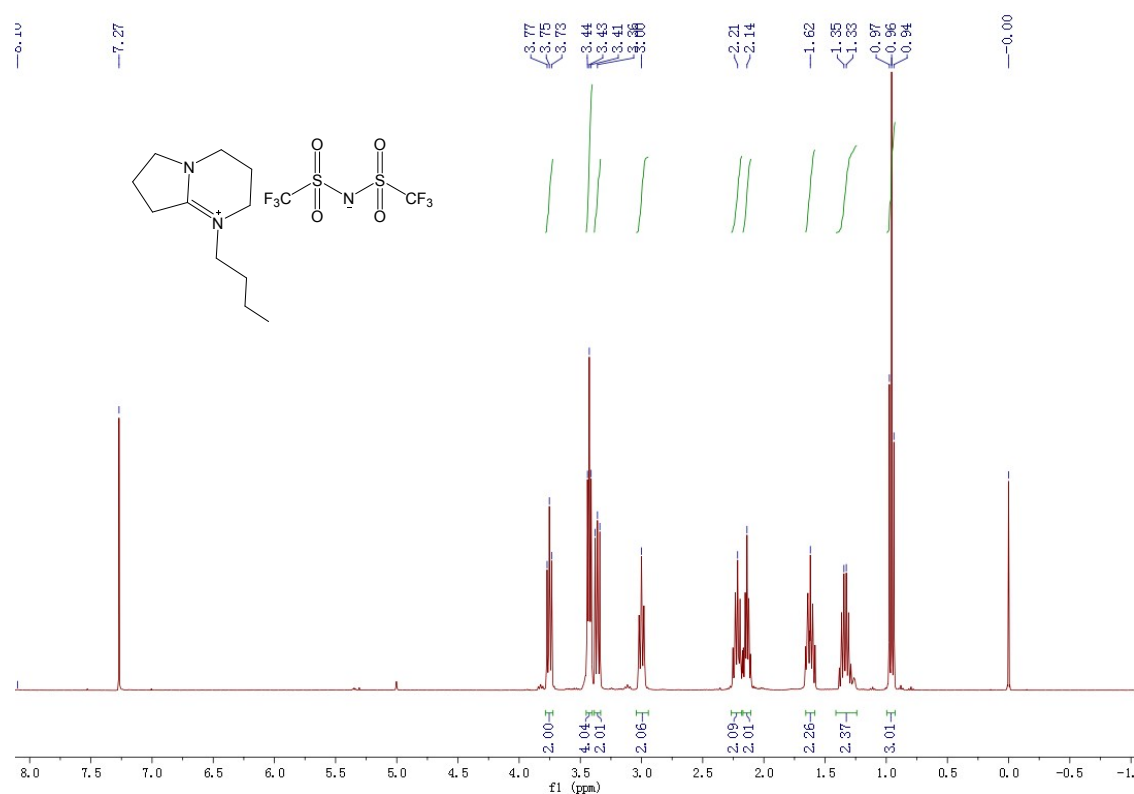

Fig. S1 <sup>1</sup>H NMR of [BuDBN][TFSI] in d<sub>6</sub>-chloroform

ZQH-20151211-DEMR

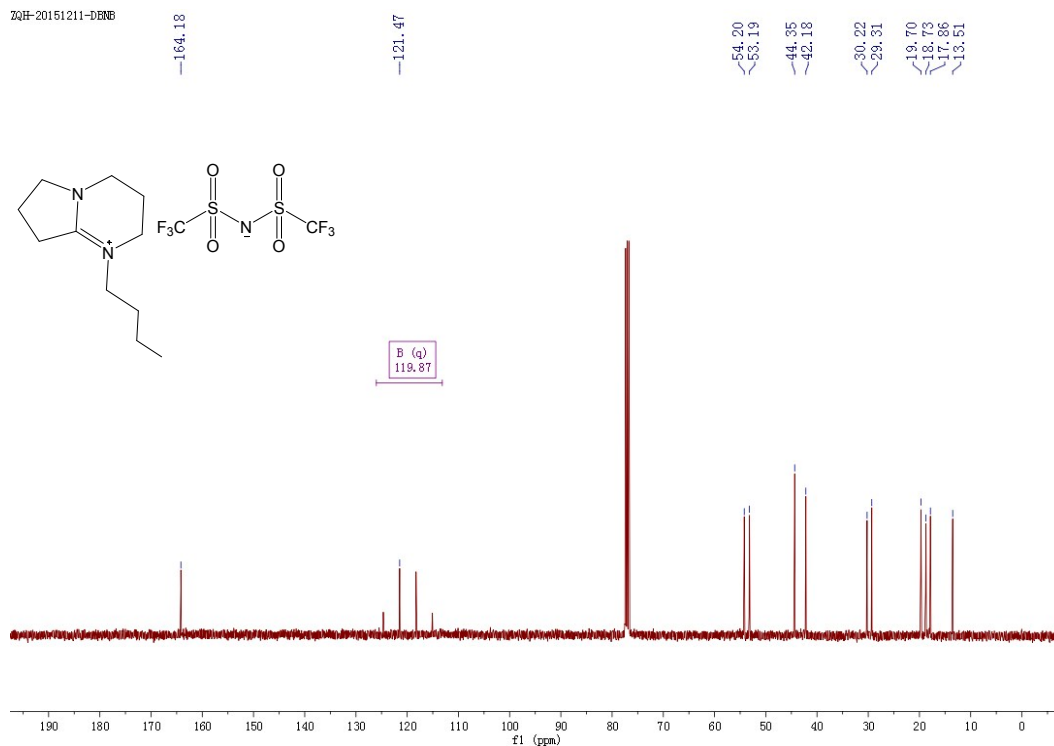

Fig. S2  $^{13}\text{C}$  NMR of [BuDBN][TFSI] in  $\text{d}_6$ -chloroform

20150723

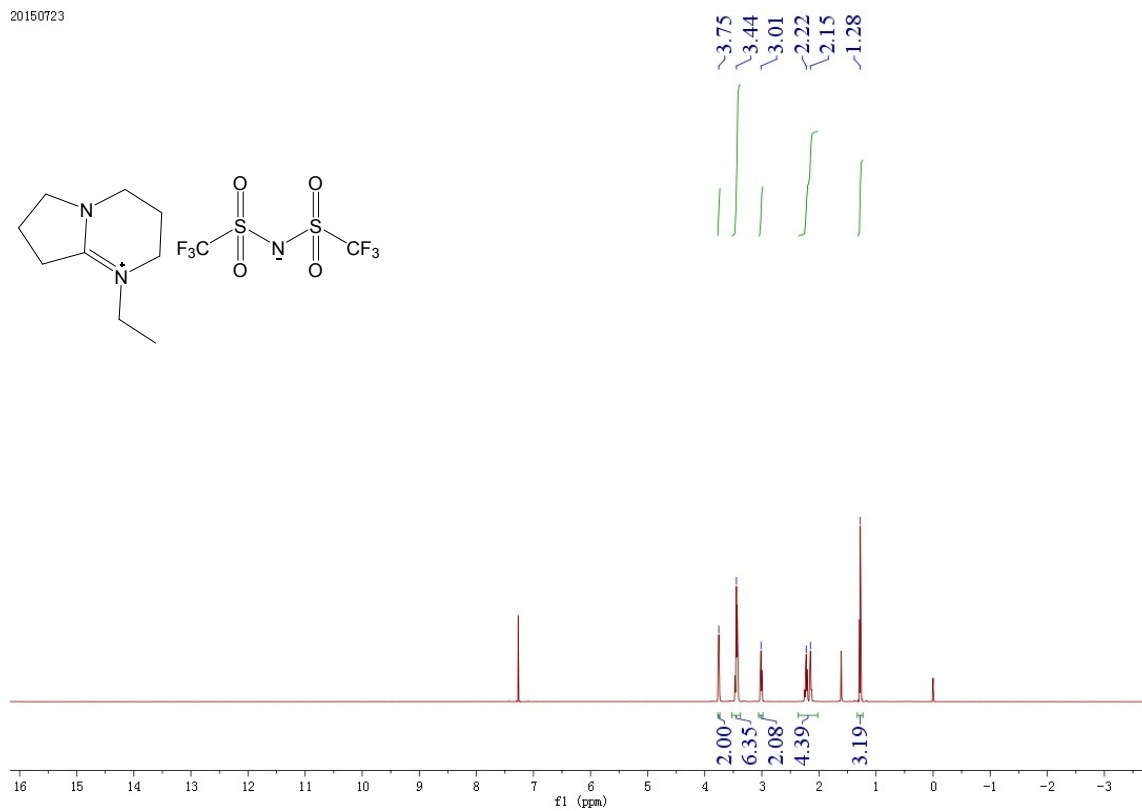

Fig. S3  $^1\text{H}$  NMR of [EtDBN][TFSI] in  $\text{d}_6$ -chloroform

ZQH-20151211-DBNE

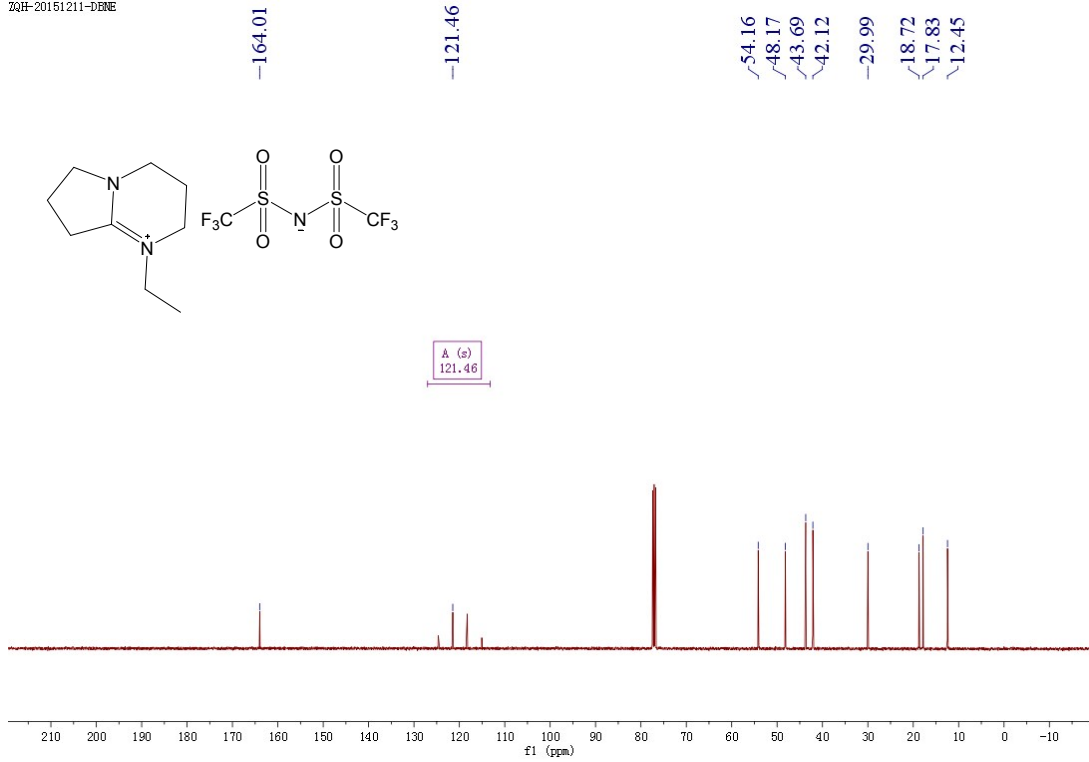

Fig. S4 <sup>13</sup>C NMR of [EtDBN][TFSI] in d<sub>6</sub> chloroform

ZQH-20151015-WZ-PD

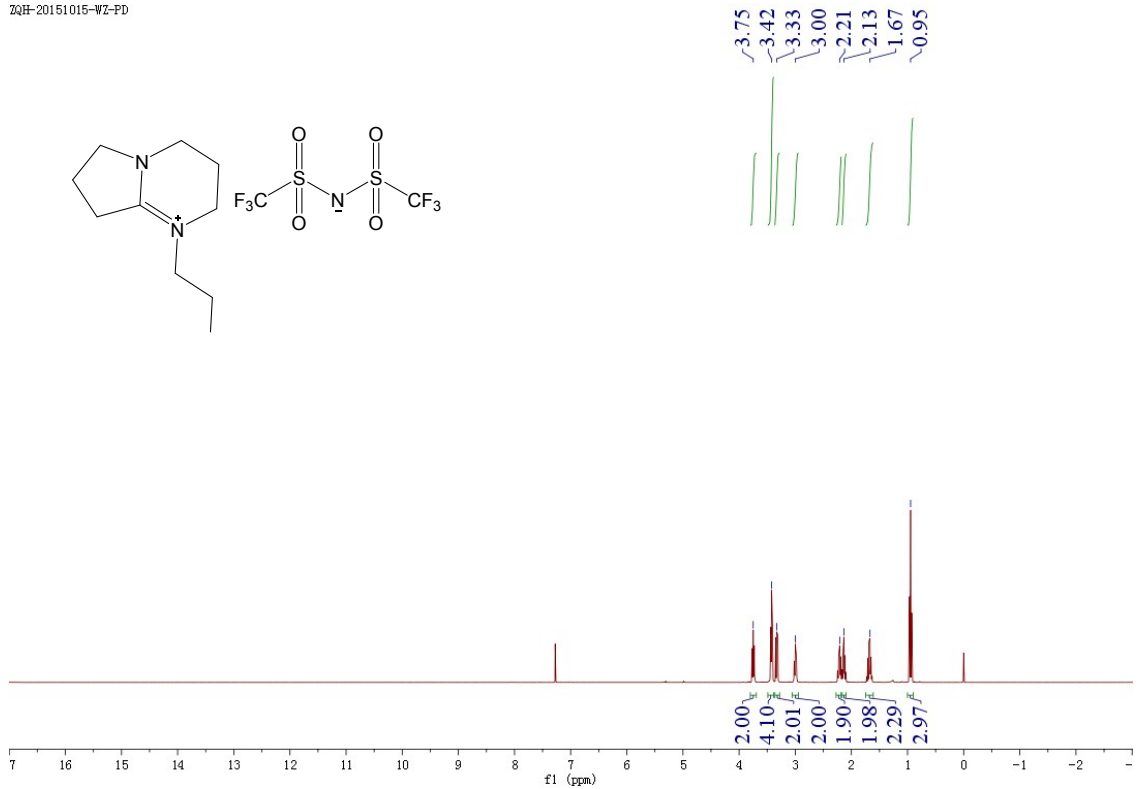

Fig. S5 <sup>1</sup>H NMR of [PrDBN][TFSI] in d<sub>6</sub> chloroform

ZQH-20151211-DENP

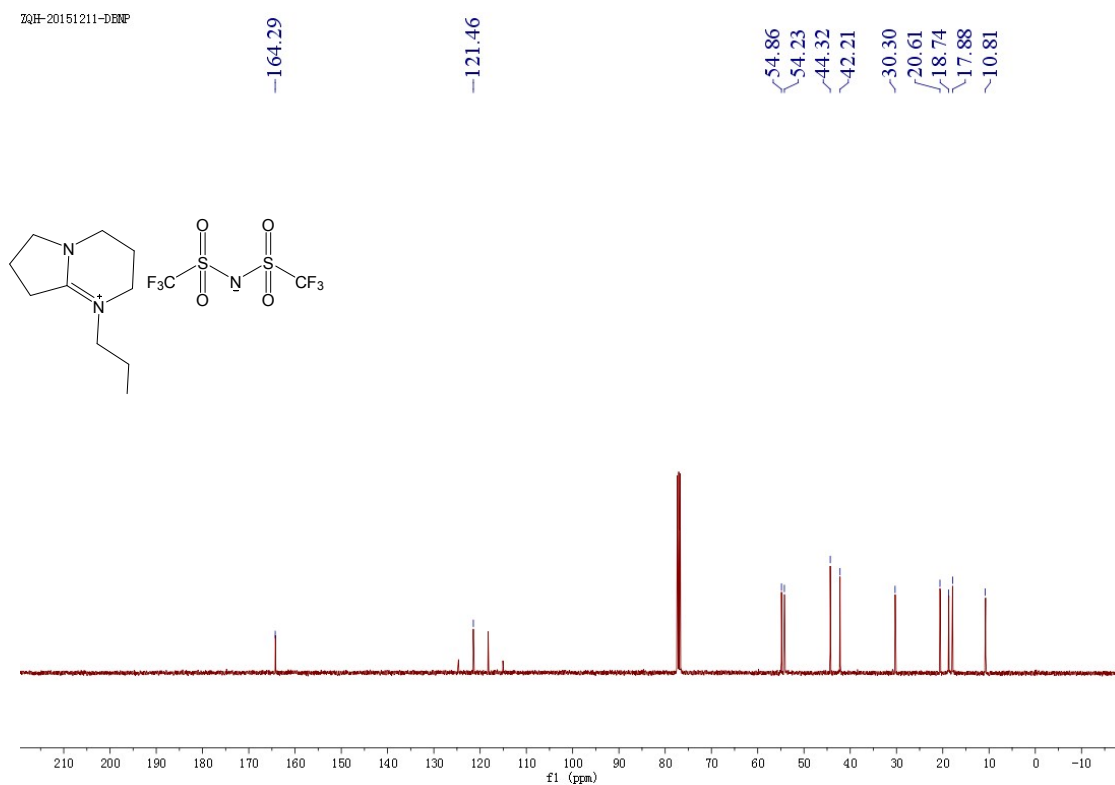

Fig. S6  $^{13}\text{C}$  NMR of [PrDBN][TFSI] in  $\text{d}_6$ -chloroform

ZQH-20151027-DBUE

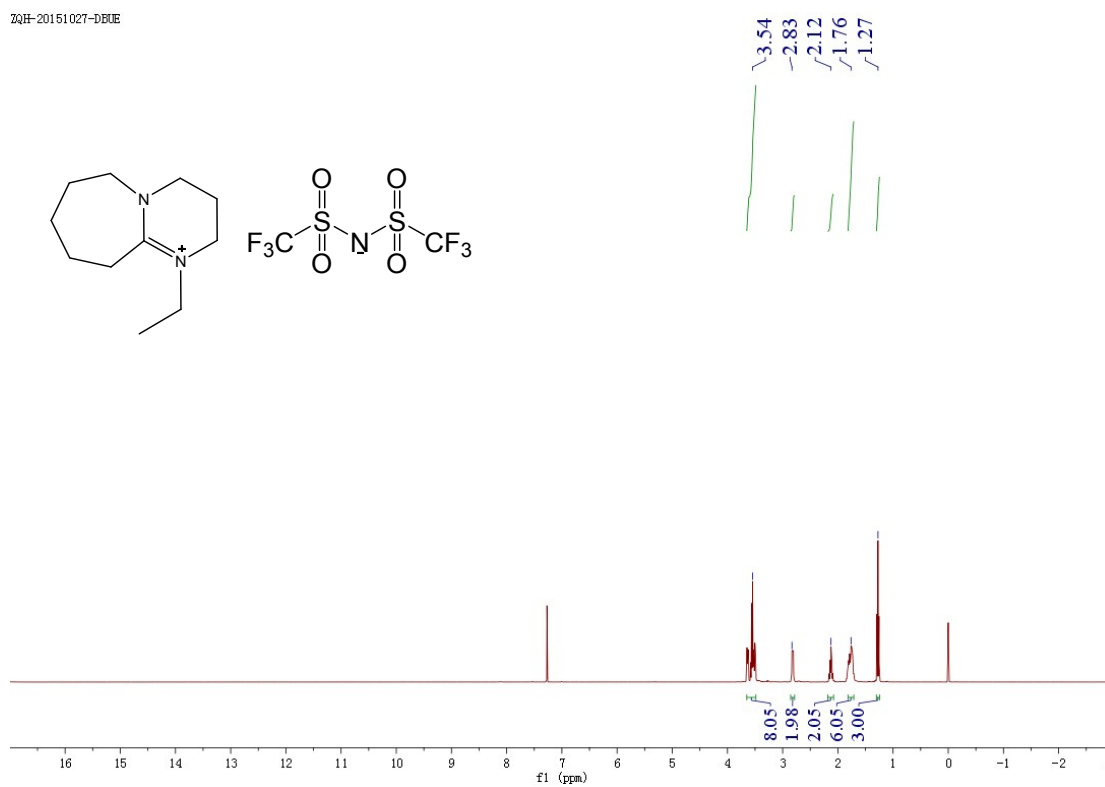

Fig. S7  $^1\text{H}$  NMR of [EtDBU][TFSI] in  $\text{d}_6$ -chloroform

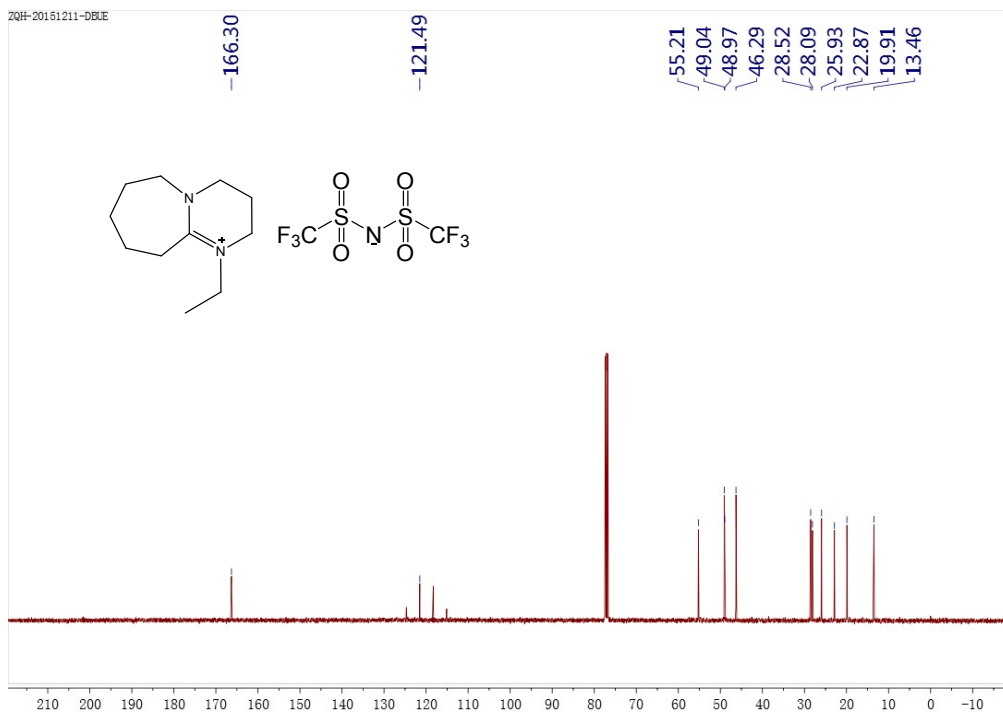

Fig. S8  $^{13}\text{C}$  NMR of [EtDBU][TFSI] in  $\text{d}_6$ -chloroform

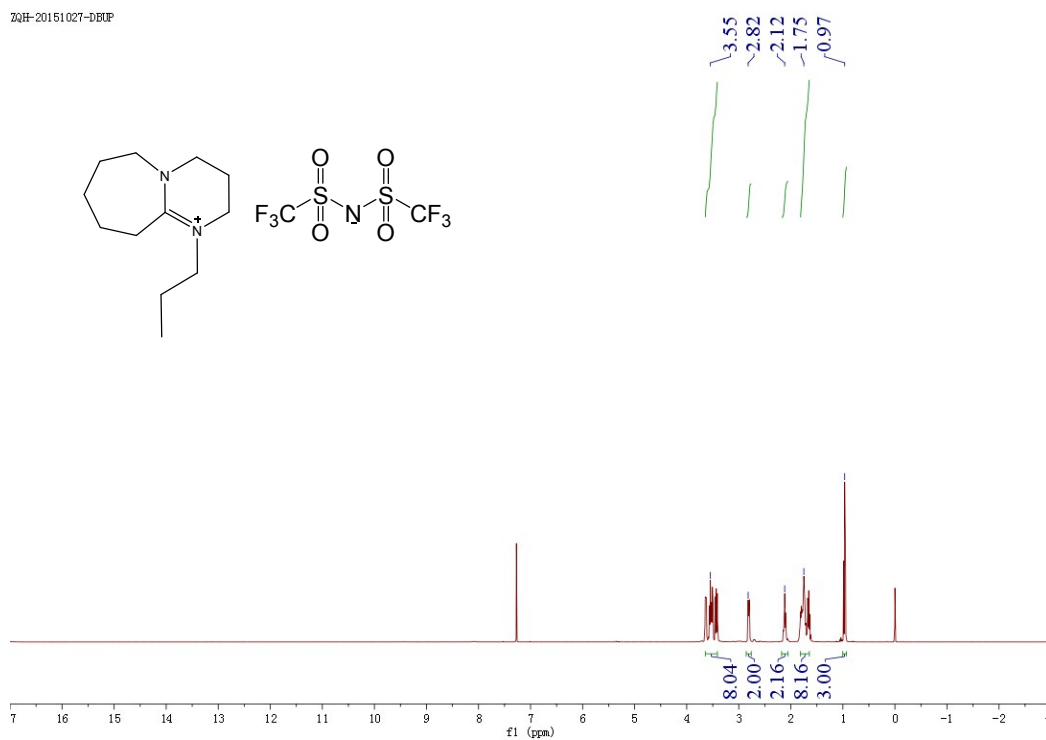

Fig. S9  $^1\text{H}$  NMR of [PrDBU][TFSI] in  $\text{d}_6$ -chloroform

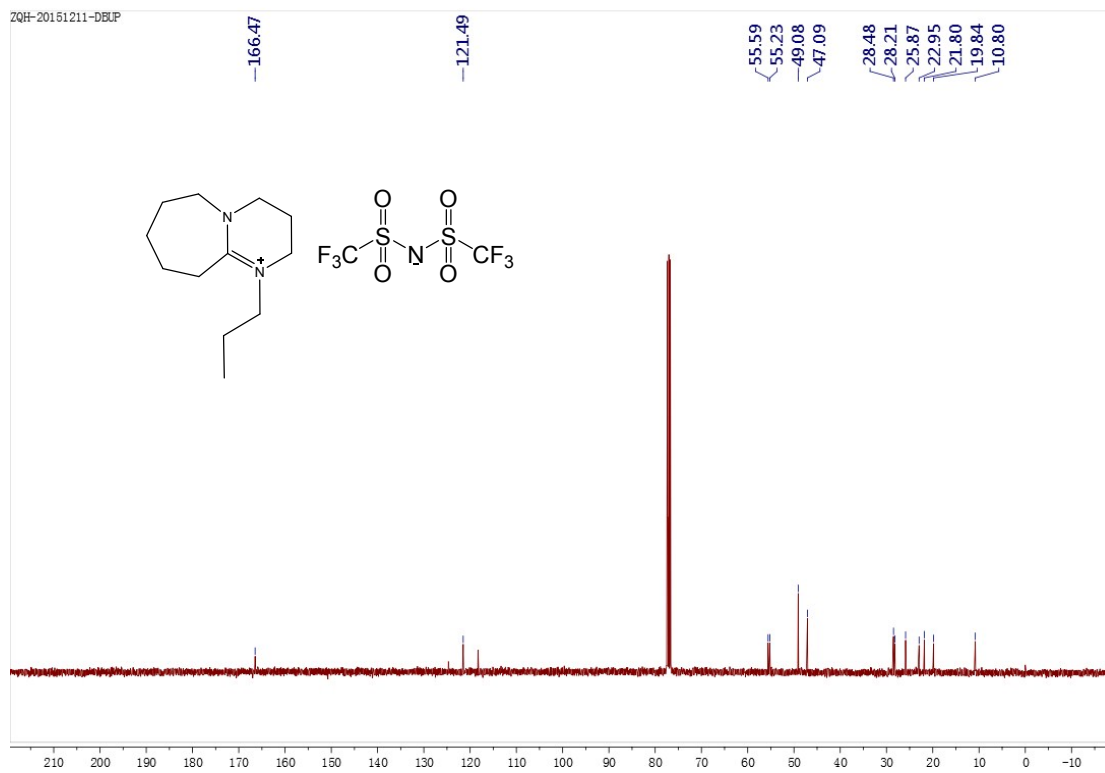

Fig. S10  $^{13}\text{C}$  NMR of [PrDBU][TFSI] in  $\text{d}^6$ -chloroform

### 3. The cyclic voltammetry scan of ionic liquids

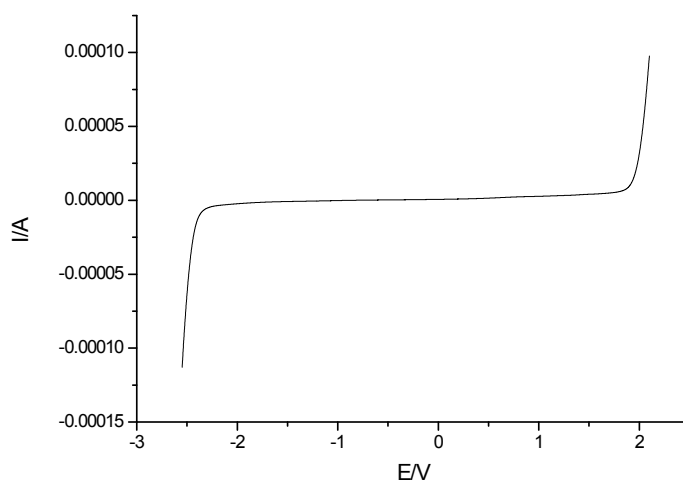

Fig. S11 The electrochemical window of [EtDBN][TFSI] at GC/Ag/Pt

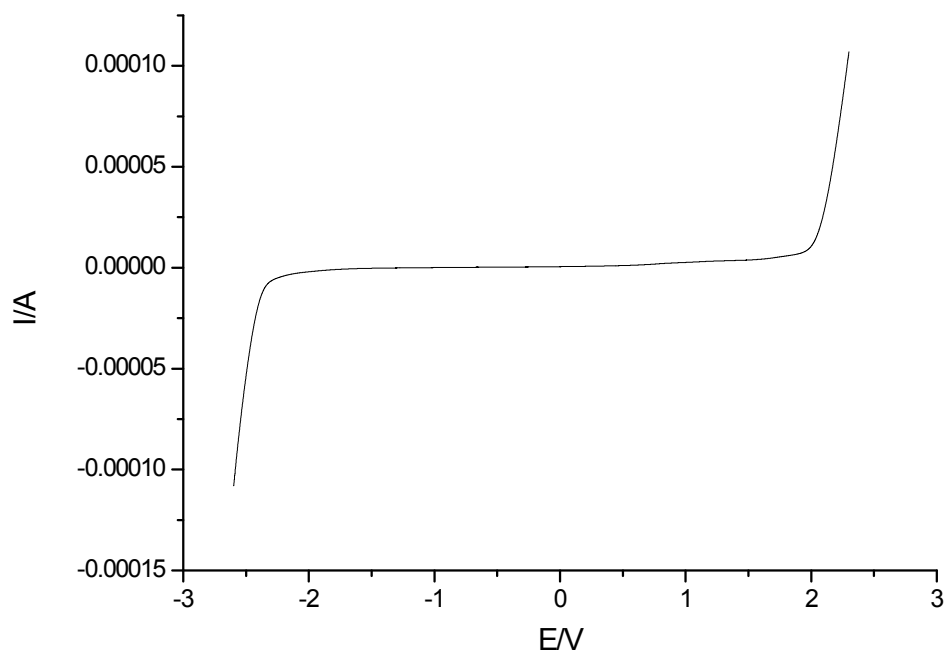

Fig. S12 The electrochemical window of [BuDBN][TFSI] at GC/Ag/Pt

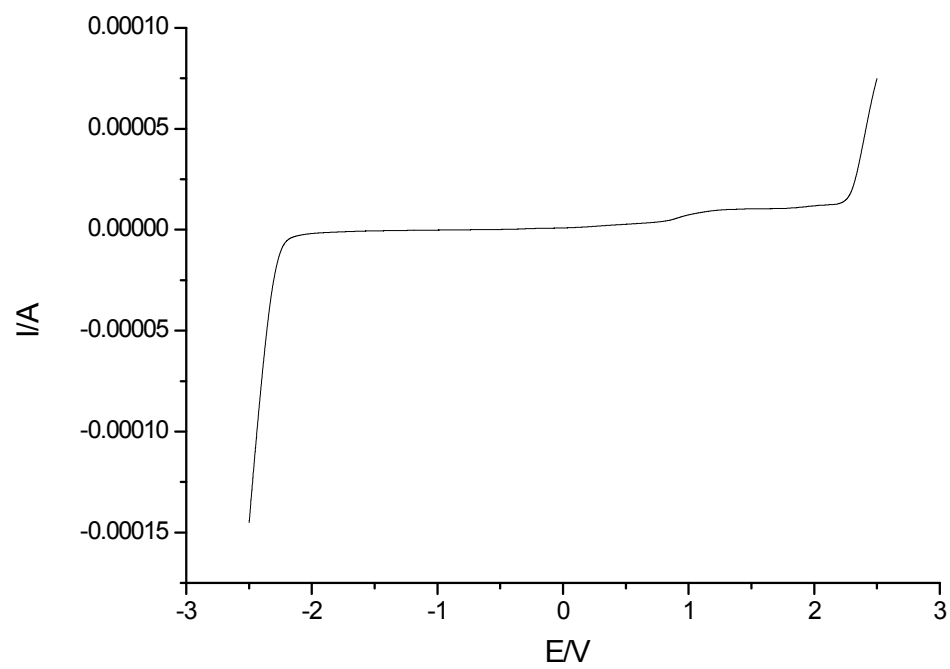

Fig. S13 The electrochemical window of [PrDBN][TFSI] at GC/Ag/Pt

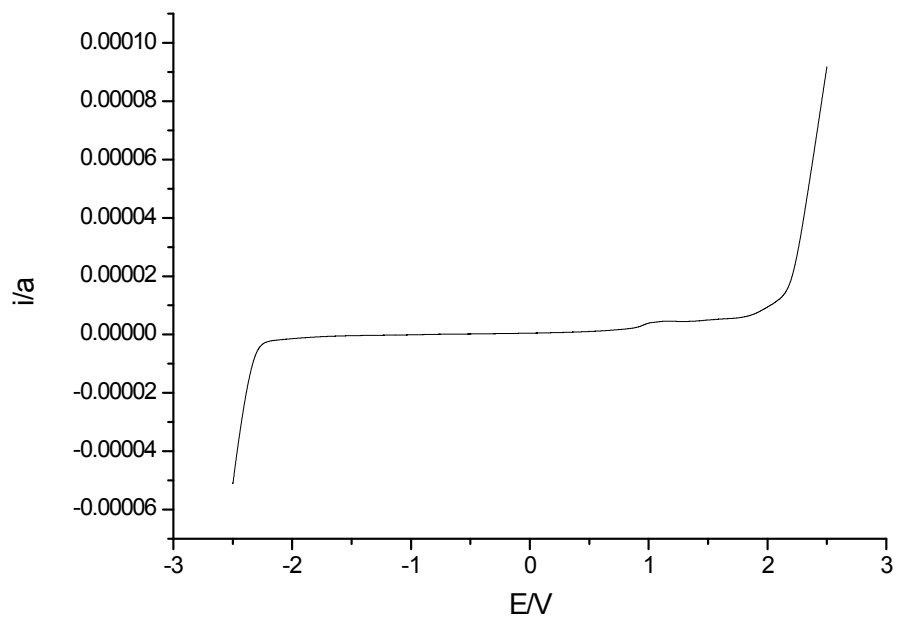

Fig. S14 The electrochemical window of [EtDBU][TFSI] at GC/Ag/Pt

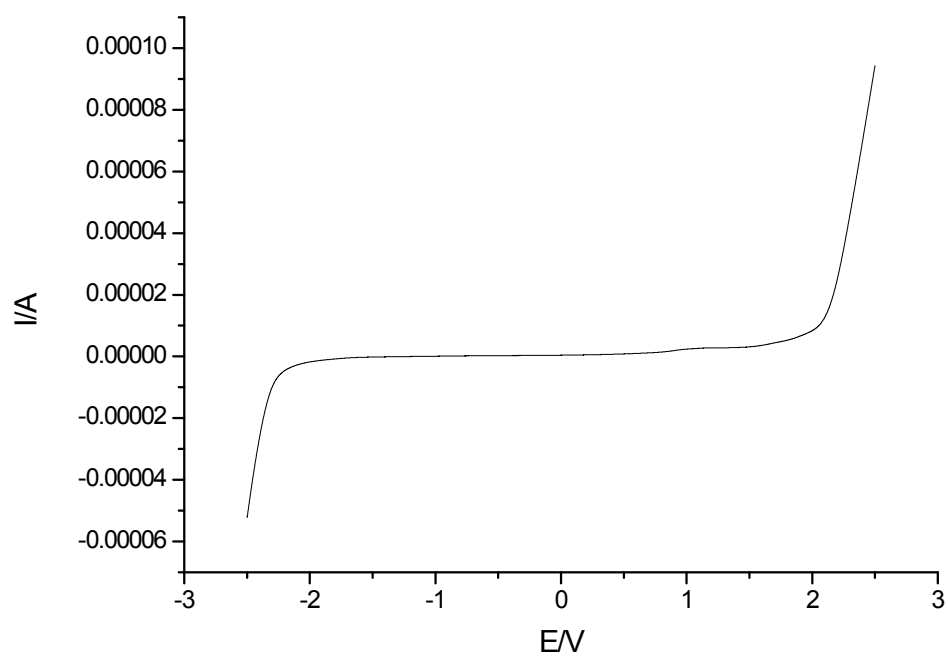

Fig. S15 The electrochemical window of [PrDBU][TFSI] at GC/Ag/Pt



#### 4. The Specific capacitance data

Table S1 The specific capacitance of ILs

| Name          |          | Specific capacitance (F/g) |        |
|---------------|----------|----------------------------|--------|
| [PrDBU][TFSI] | CV(mA/g) | 5                          | 65.25  |
|               |          | 10                         | 42.66  |
|               |          | 20                         | 29.46  |
|               |          | 50                         | 14.39  |
|               | GCP      | 0.2                        | 110.05 |
|               |          | 0.5                        | 57.01  |
|               |          | 1                          | -----  |
|               |          | 2                          | -----  |
| [EtDBU][TFSI] | CV(mA/g) | 5                          | 54.35  |
|               |          | 10                         | 34.70  |
|               |          | 20                         | 23.37  |
|               |          | 50                         | 9.81   |
|               | GCP      | 0.2                        | 99.17  |
|               |          | 0.5                        | 46.86  |
|               |          | 1                          | -----  |
|               |          | 2                          | -----  |
| [PrDBN][TFSI] | CV(mA/g) | 5                          | 25.49  |
|               |          | 10                         | 19.59  |
|               |          | 20                         | 10.92  |
|               |          | 50                         | 4.61   |
|               | GCP      | 0.2                        | 34.10  |
|               |          | 0.5                        | -----  |
|               |          | 1                          | -----  |
|               |          | 2                          | -----  |
| [EtDBN][TFSI] | CV(mA/g) | 5                          | 112.01 |
|               |          | 10                         | 101.60 |
|               |          | 20                         | 78.29  |
|               |          | 50                         | 46.71  |
|               | GCP      | 0.2                        | 123.51 |
|               |          | 0.5                        | 98.94  |
|               |          | 1                          | 80.18  |
|               |          | 2                          | 50.18  |
| [BuDBN][TFSI] | CV(mA/g) | 5                          | 79.89  |
|               |          | 10                         | 58.85  |
|               |          | 20                         | 44.27  |
|               |          | 50                         | 20.67  |
|               | GCP      | 0.2                        | 92.33  |
|               |          | 0.5                        | 63.99  |
|               |          | 1                          | 36.12  |
|               |          |                            |        |
